# Supplementary material
Source: Springer Nature journal article supplement (https://www.springermedizin.de/resource/supplementary/12908_2006_47_MOESM3_ESM.pdf/9525308)

Observed nicotine plasma concentration ( $\mu\text{g/l}$ )

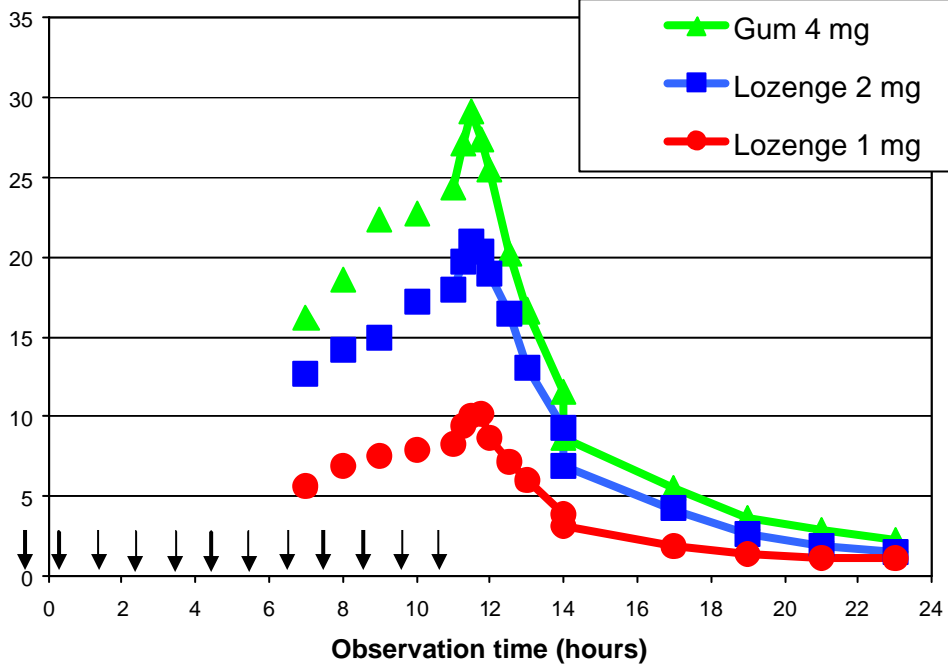

Supplement: MOESM3 [file 9525308]
